# Supplementary material for: Theoretical investigations on fluorinated and cyano copolymers for improvements of photovoltaic performances
Source: Royal Society of Chemistry journal article supplement (doi:10.1039/c3cp53268b), 2013-10-17
Supplement: c3cp53268b.pdf [file c3cp53268b.pdf]

## **Electronic Supplementary Information**

### **Theoretical investigations on fluorinated and cyano copolymers for improvements of photovoltaic performances**

**Xiaorui Liu, Ming Li, Rongxing He, Wei Shen\***

*School of Chemistry and Chemical Engineering, Southwest University, Chongqing 400715, China*

---

\* Corresponding author, shenw@swu.edu.cn

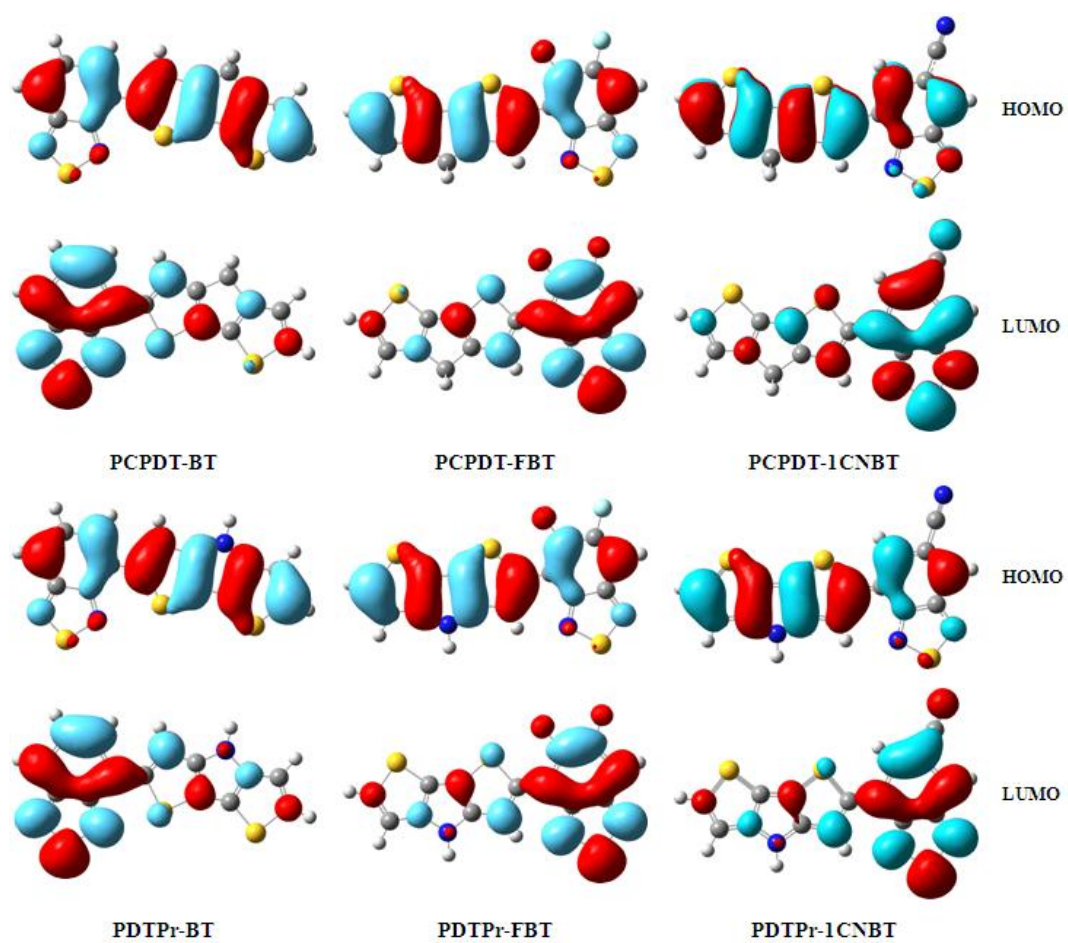

**Fig. 1S** Molecular orbital spatial distribution of all monomer models.

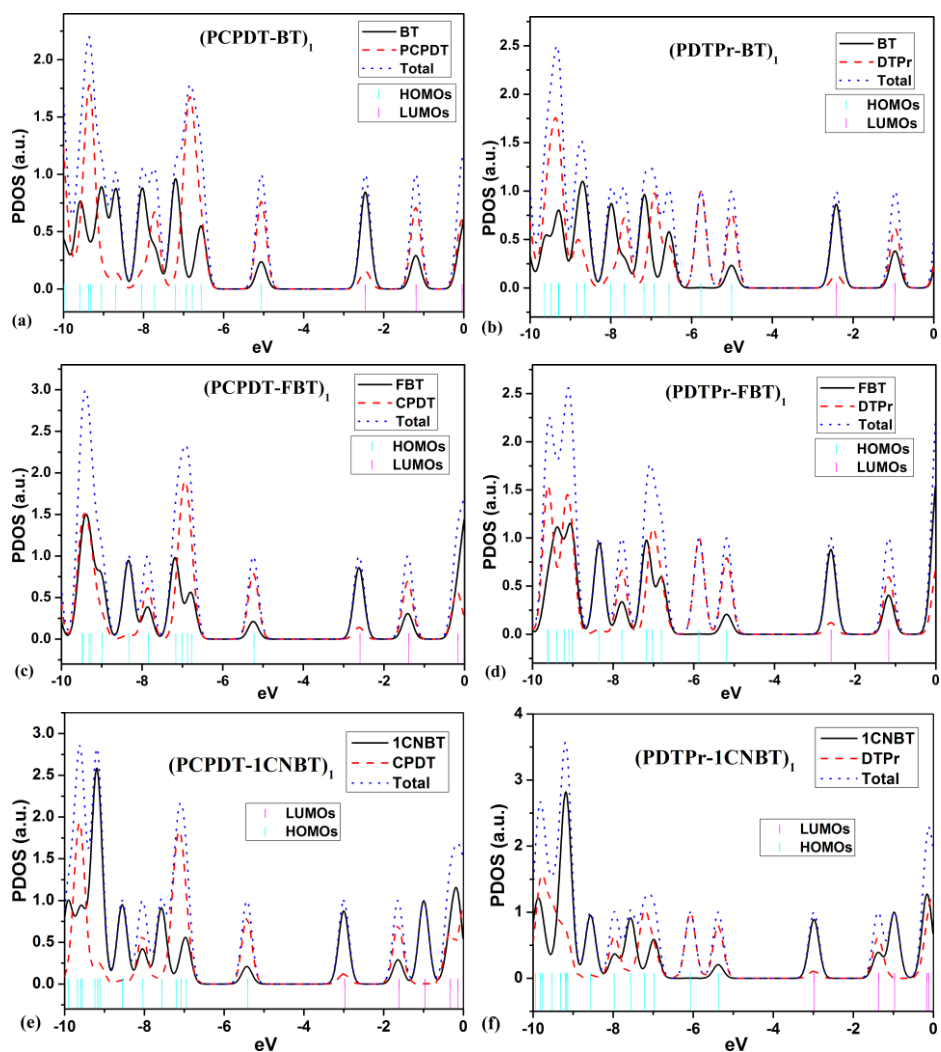

**Fig. 2S** Total densities of states (TDOS) and projected DOS (PDOS) for all monomer models.

**Table 1S** The orbital energy levels (HOMO and LUMO) and band gap (Eg) of monomer and dimer models at the B3LYP/6-31G(d) level. All the energy is eV.

|             | Dimers |       |      | Monomers |       |      |
|-------------|--------|-------|------|----------|-------|------|
|             | HOMO   | LUMO  | Eg   | HOMO     | LUMO  | Eg   |
| PCPDT-BT    | -4.69  | -2.73 | 1.96 | -5.06    | -2.46 | 2.60 |
| PDTPr-BT    | -4.64  | -2.67 | 1.97 | -5.00    | -2.41 | 2.59 |
| PCPDT-FBT   | -4.88  | -2.87 | 2.01 | -5.24    | -2.61 | 2.63 |
| PDTPr-FBT   | -4.83  | -2.83 | 2.00 | -5.18    | -2.59 | 2.59 |
| PCPDT-1CNBT | -5.08  | -3.28 | 1.80 | -5.43    | -2.99 | 2.44 |
| PDTPr-1CNBT | -5.00  | -3.21 | 1.79 | -5.37    | -2.98 | 2.39 |

**Table 2S** The  $\pi$ -stacking of the six dimers from B97-D/6-31g(d) calculation and optimizations.

|             | Side face                                                                           | Front face                                                                           |
|-------------|-------------------------------------------------------------------------------------|--------------------------------------------------------------------------------------|
| PCPDT-BT    | 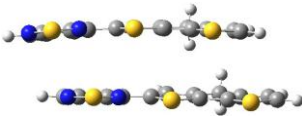   |    |
| PDTPr-BT    |    |    |
| PCPDT-FBT   |    |    |
| PDTPr-FBT   |   |   |
| PCPDT-1CNBT |  |  |
| PDTPr-1CNBT |  |  |

## 1. The relationship between the theoretical energy levels and experimental energy levels

Recently, it is well known that for the energy levels and band gaps of organic conductor materials, there exists a great difference between theoretical calculations and experimentally measured values. Beaupré and co-workers<sup>1</sup> proposed a reliable model that can be used to estimate the electronic properties (i.e., the HOMO, LUMO, and band gap energies) of conjugated polymers, which would be a great tool for applications in organic electronics such as light-emitting diodes, field-effect transistors, and photovoltaic cells. A similar model used to predict the energy levels of the new polymer was proposed by Blouin and co-workers.<sup>2</sup> From the models, for a class of copolymers we found that the change trend for the energy levels values of density functional theory theoretical calculations and that of experimental data is consistent. Herein, we selected a class of donor-acceptor(D/A) polymers without bridge thiophene ring to calculate their orbital energy levels in comparison with the energy levels values obtained by cyclic voltammetry measurement of corresponding copolymers been reported in literatures.<sup>3-7</sup>

The chemical structure of a class of D/A copolymers were shown in Scheme 1S. The energy levels and energy band-gap of theoretical calculation and experimental values for a class of copolymers (dimer models) are listed in Table 3S. The correlation of theoretical and experimental HOMO and LUMO are in figure 3S. The empirical correlations between theoretical energy levels ( $HOMO_{th}$  and  $LUMO_{th}$ ) and experimental energy levels (HOMO and LUMO) for the class of DA copolymers are in following equations:

$$HOMO = 0.65 \times HOMO_{th} - 1.97 \quad (R = 0.97) \quad (1)$$

$$LUMO = 0.83 \times LUMO_{th} - 0.94 \quad (R = 0.93) \quad (2)$$

From the Eq (1) and (2), one can see that the ten-pointsmodel gave relatively good correlation coefficients ( $R > 0.92$ ) and these equations have been used to estimate the HOMO and LUMO energy levels of several analogous derivatives.

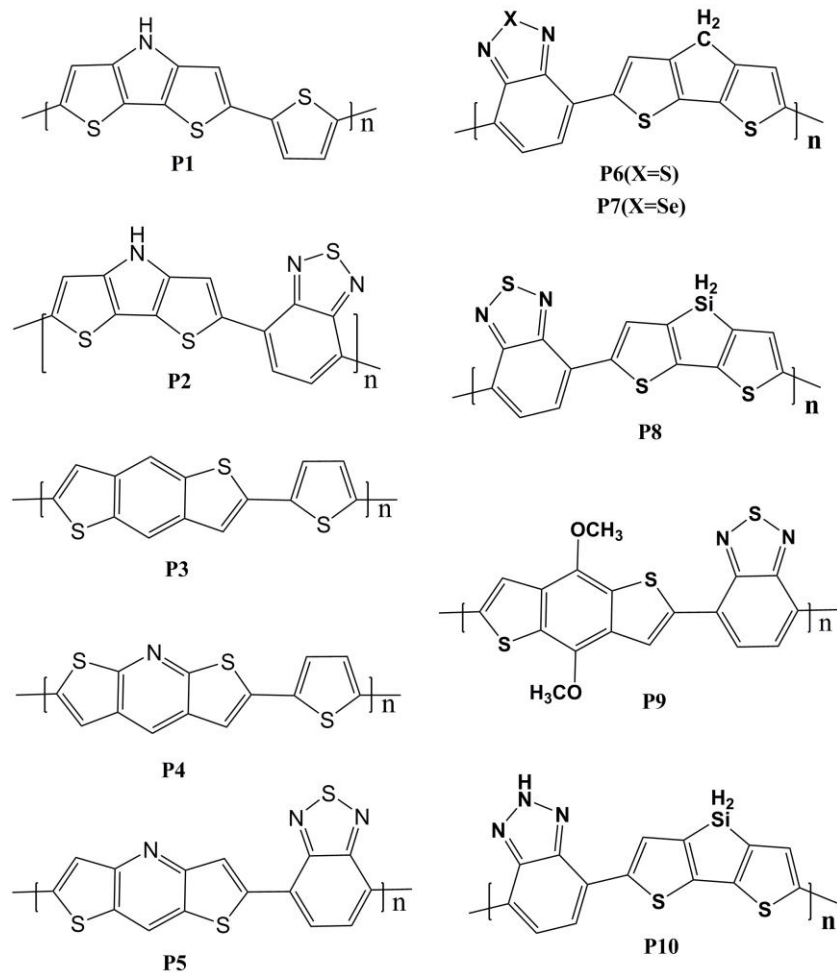

**Scheme 1S.** The chemical structure of a class of DA copolymers.

**Table 3S** The energy levels and energy band-gap of theoretical calculation and experimental values for a class of copolymers (dimer models), all energy is eV.

|     | Ref.         | Experimental values |       |                | Theory <sup>a</sup> |       |                |
|-----|--------------|---------------------|-------|----------------|---------------------|-------|----------------|
|     |              | HOMO                | LUMO  | E <sub>g</sub> | HOMO                | LUMO  | E <sub>g</sub> |
| P1  | <sup>3</sup> | -4.89               | -2.56 | 2.33           | -4.5                | -1.89 | 2.61           |
| P2  | <sup>3</sup> | -4.94               | -3.07 | 1.87           | -4.64               | -2.67 | 1.97           |
| P3  | <sup>3</sup> | -5.35               | -2.62 | 2.73           | -5.06               | -2.18 | 2.88           |
| P4  | <sup>3</sup> | -5.43               | -2.97 | 2.46           | -5.37               | -2.3  | 3.07           |
| P5  | <sup>3</sup> | -5.56               | -3.33 | 2.23           | -5.54               | -2.97 | 2.57           |
| P6  | <sup>4</sup> | -5.00               | -3.40 | 1.60           | -4.66               | -2.72 | 1.94           |
| P7  | <sup>4</sup> | -4.90               | -3.28 | 1.62           | -4.58               | -2.77 | 1.81           |
| P8  | <sup>6</sup> | -5.05               | -3.27 | 1.78           | -4.87               | -2.83 | 2.03           |
| P9  | <sup>7</sup> | -5.10               | -3.19 | 1.91           | -4.67               | -2.76 | 1.91           |
| P10 | <sup>5</sup> | -5.09               | -2.76 | 2.33           | -4.77               | -2.39 | 2.38           |

<sup>a</sup>The energy levels and energy band-gap of theoretical calculation carried at the levels of DFT/B3LYP/6-31G(d) in dimer models



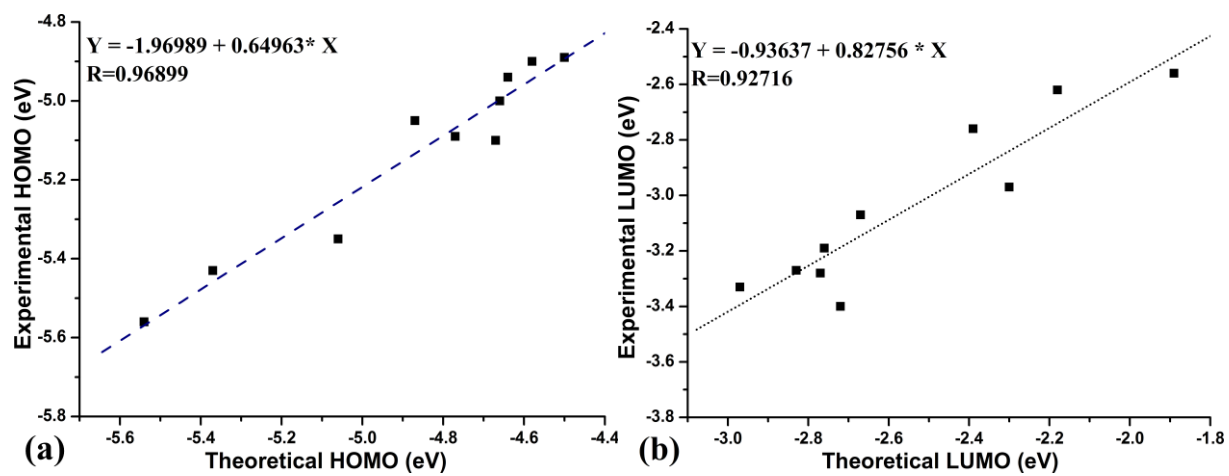

Figure 3S. Theoretical and experimental HOMO (a) and LUMO (b).

## References

1. S. Beaupré, M. Belletête, G. Durocher and M. Leclerc, *Macromol. Theor. Simul.*, 2011, **20**, 13-18.
2. N. Blouin, A. Michaud, D. Gendron, S. Wakim, E. Blair, R. Neagu-Plesu, M. Belletête, G. Durocher, Y. Tao and M. Leclerc, *J. Am. Chem. Soc.*, 2008, **130**, 732-742.
3. S. C. Price, A. C. Stuart and W. You, *Macromolecules*, 2010, **43**, 797-804.
4. J. Hou, T. L. Chen, S. Zhang and Y. Yang, *J. Phys. Chem. C*, 2009, **113**, 1601-1605.
5. M. Jie, Z.-G. Zhang, S. Zhang, M. Zhang, J. Zhang, Li, Y., *Macromolecules*, 2011, **44**, 7632-7638.
6. J. Hou, H. Y. Chen, S. Zhang, G. Li and Y. Yang, *J. Am. Chem. Soc.*, 2008, **130**, 16144-16145.
7. J. Hou, M. H. Park, S. Zhang, Y. Yao, L. M. Chen, J. H. Li and Y. Yang, *Macromolecules*, 2008, **41**, 6012-6018.
